# Supplementary material
Source: publisher figshare collection journal article supplement (https://acs.figshare.com/ndownloader/files/5710629)
Supplement: Supplementary file 1 [file 5710629]

# ic980282s.cif

data_as005 
  
_audit_creation_method            SHELXL 
_chemical_name_systematic 
; 
 ? 
; 
_chemical_name_common             ? 
_chemical_formula_moiety          ? 
_chemical_formula_structural      ? 
_chemical_formula_analytical      ? 
_chemical_formula_sum             'C54 H42 In P3 S3' 
_chemical_formula_weight          994.79 
_chemical_melting_point           ? 
_chemical_compound_source         ? 
  
loop_ 
 _atom_type_symbol 
 _atom_type_description 
 _atom_type_scat_dispersion_real 
 _atom_type_scat_dispersion_imag 
 _atom_type_scat_source 
 'C'  'C'   0.0033   0.0016 
 'International Tables Vol C Tables 4.2.6.8 and 6.1.1.4' 
 'H'  'H'   0.0000   0.0000 
 'International Tables Vol C Tables 4.2.6.8 and 6.1.1.4' 
 'P'  'P'   0.1023   0.0942 
 'International Tables Vol C Tables 4.2.6.8 and 6.1.1.4' 
 'S'  'S'   0.1246   0.1234 
 'International Tables Vol C Tables 4.2.6.8 and 6.1.1.4' 
 'In'  'In'  -0.7276   1.3100 
 'International Tables Vol C Tables 4.2.6.8 and 6.1.1.4' 
  
_symmetry_cell_setting            Monoclinic 
_symmetry_space_group_name_H-M    P2(1)/c 
  
loop_ 
 _symmetry_equiv_pos_as_xyz 
 'x, y, z' 
 '-x, y+1/2, -z+1/2' 
 '-x, -y, -z' 
 'x, -y-1/2, z-1/2' 
  
_cell_length_a                    16.6579(1) 
_cell_length_b                    12.6628(2) 
_cell_length_c                    22.5520(3) 
_cell_angle_alpha                 90.00 
_cell_angle_beta                  96.42(1) 
_cell_angle_gamma                 90.00 
_cell_volume                      4727.15(1) 
_cell_formula_units_Z             4 
_cell_measurement_temperature     298(2) 
_cell_measurement_reflns_used     'reflections from 60 data frames' 
_cell_measurement_theta_min       1.47 
_cell_measurement_theta_max       30.00 
  
_exptl_crystal_description        block 
_exptl_crystal_colour             ? 
_exptl_crystal_size_max           0.20 
_exptl_crystal_size_mid           0.20 
_exptl_crystal_size_min           0.10 
_exptl_crystal_density_meas       ? 
_exptl_crystal_density_diffrn     1.398 
_exptl_crystal_density_method     ? 
_exptl_crystal_F_000              2032 
_exptl_absorpt_coefficient_mu     0.770 
_exptl_absorpt_correction_type    empirical 
_exptl_absorpt_correction_T_min   0.1963 
_exptl_absorpt_correction_T_max   0.3383 
  
_exptl_special_details 
; 
 ? 
; 
  
_diffrn_ambient_temperature       298(2) 
_diffrn_radiation_wavelength      0.71073 
_diffrn_radiation_type            MoK\a 
_diffrn_radiation_source          'fine-focus sealed tube' 
_diffrn_radiation_monochromator   graphite 
_diffrn_measurement_device        'Siemens P4' 
_diffrn_measurement_method        '\w scans' 
_diffrn_standards_number          '50 standard frames at start and end' 
_diffrn_standards_interval_count  ? 
_diffrn_standards_interval_time   ? 
_diffrn_standards_decay_%         <1 
_diffrn_reflns_number             19116 
_diffrn_reflns_av_R_equivalents   0.0702 
_diffrn_reflns_av_sigmaI/netI     0.0722 
_diffrn_reflns_limit_h_min        -20 
_diffrn_reflns_limit_h_max        21 
_diffrn_reflns_limit_k_min        -16 
_diffrn_reflns_limit_k_max        16 
_diffrn_reflns_limit_l_min        -30 
_diffrn_reflns_limit_l_max        24 
_diffrn_reflns_theta_min          1.23 
_diffrn_reflns_theta_max          22.50 
_reflns_number_total              6176 
_reflns_number_observed           4779 
_reflns_observed_criterion        >2sigma(I) 
  
_computing_data_collection        'Siemens XSCANS' 
_computing_cell_refinement        'Siemens XSCANS' 
_computing_data_reduction         'Siemens SHELXTL' 
_computing_structure_solution     'SHELXS-86 (Sheldrick, 1990)' 
_computing_structure_refinement   'SHELXL-93 (Sheldrick, 1993)' 
_computing_molecular_graphics     'Siemens SHELXTL' 
_computing_publication_material   'Siemens SHELXTL' 
  
_refine_special_details 
; 
 Refinement on F^2^ for ALL reflections except for 1 with very negative F^2^ 
 or flagged by the user for potential systematic errors.  Weighted R-factors 
 wR and all goodnesses of fit S are based on F^2^, conventional R-factors R 
 are based on F, with F set to zero for negative F^2^. The observed criterion 
 of F^2^ > 2sigma(F^2^) is used only for calculating _R_factor_obs etc. and is 
 not relevant to the choice of reflections for refinement.  R-factors based 
 on F^2^ are statistically about twice as large as those based on F, and R- 
 factors based on ALL data will be even larger. 
; 
  
_refine_ls_structure_factor_coef  Fsqd 
_refine_ls_matrix_type            full 
_refine_ls_weighting_scheme 
 'calc w=1/[\s^2^(Fo^2^)+(0.0875P)^2^+0.0000P] where P=(Fo^2^+2Fc^2^)/3' 
_atom_sites_solution_primary      direct 
_atom_sites_solution_secondary    difmap 
_atom_sites_solution_hydrogens    geom 
_refine_ls_hydrogen_treatment     idealized 
_refine_ls_extinction_method      none 
_refine_ls_extinction_coef        ? 
_refine_ls_number_reflns          6175 
_refine_ls_number_parameters      550 
_refine_ls_number_restraints      0 
_refine_ls_R_factor_all           0..0782 
_refine_ls_R_factor_obs           0.0579 
_refine_ls_wR_factor_all          0.1522 
_refine_ls_wR_factor_obs          0.1392 
_refine_ls_goodness_of_fit_all    1.030 
_refine_ls_goodness_of_fit_obs    1.107 
_refine_ls_restrained_S_all       1.053 
_refine_ls_restrained_S_obs       1.107 
_refine_ls_shift/esd_max          0.022 
_refine_ls_shift/esd_mean         0.003 
  
loop_ 
 _atom_site_label 
 _atom_site_type_symbol 
 _atom_site_fract_x 
 _atom_site_fract_y 
 _atom_site_fract_z 
 _atom_site_U_iso_or_equiv 
 _atom_site_thermal_displace_type 
 _atom_site_occupancy 
 _atom_site_calc_flag 
 _atom_site_refinement_flags 
 _atom_site_disorder_group 
In In 0.28797(2) 0.13859(3) 0.11071(2) 0.0346(2) Uani 1 d . . 
S1 S 0.32995(10) 0.1757(2) 0.21944(7) 0.0476(5) Uani 1 d . . 
S2 S 0.21766(11) 0.05841(14) 0.01493(8) 0.0511(5) Uani 1 d . . 
S3 S 0.43156(9) 0.13217(13) 0.08092(7) 0.0407(4) Uani 1 d . . 
P1 P 0.14634(11) 0.22022(14) 0.16502(8) 0.0465(5) Uani 1 d . . 
P2 P 0.26174(10) -0.07667(13) 0.13232(7) 0.0373(4) Uani 1 d . . 
P3 P 0.31005(10) 0.32252(13) 0.05163(7) 0.0362(4) Uani 1 d . . 
C11 C 0.2485(4) 0.1185(5) 0.2527(3) 0.040(2) Uani 1 d . . 
C12 C 0.2644(4) 0.0530(6) 0.3011(3) 0.054(2) Uani 1 d . . 
H12A H 0.3174(4) 0.0330(6) 0.3132(3) 0.065 Uiso 1 calc R . 
C13 C 0.2022(5) 0.0157(6) 0.3325(3) 0.059(2) Uani 1 d . . 
H13A H 0.2141(5) -0.0278(6) 0.3656(3) 0.071 Uiso 1 calc R . 
C14 C 0.1235(5) 0.0433(6) 0.3144(3) 0.059(2) Uani 1 d . . 
H14A H 0.0823(5) 0.0203(6) 0.3359(3) 0.071 Uiso 1 calc R . 
C15 C 0.1054(4) 0.1045(6) 0.2647(3) 0.051(2) Uani 1 d . . 
H15A H 0.0518(4) 0.1211(6) 0.2523(3) 0.062 Uiso 1 calc R . 
C16 C 0.1663(4) 0.1427(5) 0.2322(3) 0.041(2) Uani 1 d . . 
C21 C 0.0206(5) 0.1173(6) 0.1006(4) 0.074(3) Uani 1 d . . 
H21A H 0.0612(5) 0.0766(6) 0.0870(4) 0.089 Uiso 1 calc R . 
C22 C -0.0588(7) 0.0962(8) 0.0818(5) 0.096(4) Uani 1 d . . 
H22A H -0.0719(7) 0.0394(8) 0.0565(5) 0.116 Uiso 1 calc R . 
C23 C -0.1185(6) 0.1572(9) 0.0997(5) 0.095(4) Uani 1 d . . 
H23A H -0.1719(6) 0.1436(9) 0.0850(5) 0.114 Uiso 1 calc R . 
C24 C -0.1012(5) 0.2388(8) 0.1392(5) 0.090(3) Uani 1 d . . 
H24A H -0.1426(5) 0.2791(8) 0.1520(5) 0.108 Uiso 1 calc R . 
C25 C -0.0211(5) 0.2604(7) 0.1599(4) 0.073(2) Uani 1 d . . 
H25A H -0.0085(5) 0.3151(7) 0.1868(4) 0.087 Uiso 1 calc R . 
C26 C 0.0403(5) 0.1996(6) 0.1401(3) 0.055(2) Uani 1 d . . 
C31 C 0.1688(5) 0.3847(6) 0.2494(4) 0.070(2) Uani 1 d . . 
H31A H 0.1866(5) 0.3331(6) 0.2772(4) 0.084 Uiso 1 calc R . 
C32 C 0.1625(6) 0.4883(8) 0.2676(5) 0.096(3) Uani 1 d . . 
H32A H 0.1753(6) 0.5064(8) 0.3075(5) 0.116 Uiso 1 calc R . 
C33 C 0.1379(7) 0.5629(8) 0.2272(6) 0.103(4) Uani 1 d . . 
H33A H 0.1321(7) 0.6319(8) 0.2401(6) 0.124 Uiso 1 calc R . 
C34 C 0.1210(5) 0.5406(7) 0.1675(5) 0.084(3) Uani 1 d . . 
H34A H 0.1066(5) 0.5940(7) 0.1400(5) 0.101 Uiso 1 calc R . 
C35 C 0.1260(4) 0.4365(6) 0.1491(4) 0.061(2) Uani 1 d . . 
H35A H 0.1141(4) 0.4197(6) 0.1089(4) 0.073 Uiso 1 calc R . 
C36 C 0.1488(4) 0.3569(5) 0.1902(3) 0.044(2) Uani 1 d . . 
C41 C 0.2812(4) -0.0545(5) 0.0138(3) 0.045(2) Uani 1 d . . 
C42 C 0.3147(5) -0.0815(7) -0.0390(3) 0.063(2) Uani 1 d . . 
H42A H 0.3066(5) -0.0375(7) -0.0721(3) 0.075 Uiso 1 calc R . 
C43 C 0.3590(5) -0.1724(8) -0.0418(4) 0.073(3) Uani 1 d . . 
H43A H 0.3801(5) -0.1895(8) -0.0771(4) 0.088 Uiso 1 calc R . 
C44 C 0.3728(4) -0.2397(7) 0.0075(4) 0.072(2) Uani 1 d . . 
H44A H 0.4022(4) -0.3017(7) 0.0051(4) 0.086 Uiso 1 calc R . 
C45 C 0.3423(4) -0.2123(6) 0.0594(3) 0.051(2) Uani 1 d . . 
H45A H 0.3522(4) -0.2555(6) 0.0928(3) 0.062 Uiso 1 calc R . 
C46 C 0.2967(4) -0.1208(5) 0.0631(3) 0.041(2) Uani 1 d . . 
C51 C 0.4004(5) -0.1188(6) 0.2054(4) 0.069(2) Uani 1 d . . 
H51A H 0.4211(5) -0.0649(6) 0.1836(4) 0.083 Uiso 1 calc R . 
C52 C 0.4498(6) -0.1667(8) 0.2501(5) 0.087(3) Uani 1 d . . 
H52A H 0.5041(6) -0.1481(8) 0.2571(5) 0.104 Uiso 1 calc R . 
C53 C 0.4185(7) -0.2425(9) 0.2845(4) 0.095(3) Uani 1 d . . 
H53A H 0.4509(7) -0.2730(9) 0.3162(4) 0.114 Uiso 1 calc R . 
C54 C 0.3398(7) -0.2732(8) 0.2722(4) 0.098(3) Uani 1 d . . 
H54A H 0.3188(7) -0.3251(8) 0.2953(4) 0.118 Uiso 1 calc R . 
C55 C 0.2912(5) -0.2272(7) 0.2256(4) 0.073(2) Uani 1 d . . 
H55A H 0.2381(5) -0.2496(7) 0.2167(4) 0.088 Uiso 1 calc R . 
C56 C 0.3213(4) -0.1480(5) 0.1920(3) 0.047(2) Uani 1 d . . 
C61 C 0.1164(4) -0.1603(5) 0.0768(3) 0.049(2) Uani 1 d . . 
H61A H 0.1431(4) -0.1666(5) 0.0429(3) 0.058 Uiso 1 calc R . 
C62 C 0.0358(5) -0.1878(7) 0.0736(4) 0.069(2) Uani 1 d . . 
H62A H 0.0090(5) -0.2122(7) 0.0378(4) 0.083 Uiso 1 calc R . 
C63 C -0.0050(5) -0.1792(7) 0.1235(4) 0.072(2) Uani 1 d . . 
H63A H -0.0592(5) -0.1978(7) 0.1215(4) 0.087 Uiso 1 calc R . 
C64 C 0.0351(5) -0.1433(6) 0.1755(4) 0.070(2) Uani 1 d . . 
H64A H 0.0078(5) -0.1382(6) 0.2092(4) 0.083 Uiso 1 calc R . 
C65 C 0.1153(4) -0.1143(6) 0.1793(3) 0.052(2) Uani 1 d . . 
H65A H 0.1413(4) -0.0885(6) 0.2150(3) 0.062 Uiso 1 calc R . 
C66 C 0.1580(4) -0.1240(4) 0.1286(3) 0.037(2) Uani 1 d . . 
C71 C 0.4092(3) 0.1766(5) 0.0062(3) 0.0348(15) Uani 1 d . . 
C72 C 0.4420(4) 0.1237(5) -0.0398(3) 0.043(2) Uani 1 d . . 
H72A H 0.4769(4) 0.0672(5) -0.0309(3) 0.052 Uiso 1 calc R . 
C73 C 0.4229(4) 0.1546(6) -0.0985(3) 0.053(2) Uani 1 d . . 
H73A H 0.4461(4) 0.1193(6) -0.1285(3) 0.064 Uiso 1 calc R . 
C74 C 0.3707(4) 0.2361(6) -0.1133(3) 0.053(2) Uani 1 d . . 
H74A H 0.3577(4) 0.2548(6) -0.1531(3) 0.064 Uiso 1 calc R . 
C75 C 0.3370(4) 0.2909(5) -0.0687(3) 0.044(2) Uani 1 d . . 
H75A H 0.3013(4) 0.3463(5) -0.0785(3) 0.052 Uiso 1 calc R . 
C76 C 0.3573(3) 0.2617(5) -0.0087(3) 0.0342(15) Uani 1 d . . 
C81 C 0.3657(4) 0.4563(6) 0.1440(3) 0.061(2) Uani 1 d . . 
H81A H 0.3185(4) 0.4369(6) 0.1595(3) 0.073 Uiso 1 calc R . 
C82 C 0.4165(6) 0.5282(7) 0.1745(4) 0.082(3) Uani 1 d . . 
H82A H 0.4039(6) 0.5565(7) 0.2104(4) 0.098 Uiso 1 calc R . 
C83 C 0.4860(6) 0.5580(7) 0.1515(5) 0.086(3) Uani 1 d . . 
H83A H 0.5199(6) 0.6087(7) 0.1707(5) 0.103 Uiso 1 calc R . 
C84 C 0.5047(5) 0.5120(7) 0.0997(4) 0.084(3) Uani 1 d . . 
H84A H 0.5529(5) 0.5297(7) 0.0849(4) 0.101 Uiso 1 calc R . 
C85 C 0.4542(4) 0.4411(6) 0.0696(3) 0.065(2) Uani 1 d . . 
H85A H 0.4679(4) 0.4119(6) 0.0342(3) 0.078 Uiso 1 calc R . 
C86 C 0.3831(4) 0.4119(5) 0.0908(3) 0.042(2) Uani 1 d . . 
C91 C 0.1584(4) 0.3653(5) -0.0079(3) 0.048(2) Uani 1 d . . 
H91A H 0.1521(4) 0.2923(5) -0.0084(3) 0.058 Uiso 1 calc R . 
C92 C 0.0956(4) 0.4276(7) -0.0308(3) 0.061(2) Uani 1 d . . 
H92A H 0.0474(4) 0.3965(7) -0.0467(3) 0.073 Uiso 1 calc R . 
C93 C 0.1029(5) 0.5366(7) -0.0305(3) 0.062(2) Uani 1 d . . 
H93A H 0.0599(5) 0.5790(7) -0.0458(3) 0.074 Uiso 1 calc R . 
C94 C 0.1751(5) 0.5810(6) -0.0072(3) 0.062(2) Uani 1 d . . 
H94A H 0.1812(5) 0.6540(6) -0.0068(3) 0.075 Uiso 1 calc R . 
C95 C 0.2385(4) 0.5176(6) 0.0156(3) 0.056(2) Uani 1 d . . 
H95A H 0.2871(4) 0.5485(6) 0.0309(3) 0.067 Uiso 1 calc R . 
C96 C 0.2309(3) 0.4085(5) 0.0161(3) 0.0339(14) Uani 1 d . . 
  
loop_ 
 _atom_site_aniso_label 
 _atom_site_aniso_U_11 
 _atom_site_aniso_U_22 
 _atom_site_aniso_U_33 
 _atom_site_aniso_U_23 
 _atom_site_aniso_U_13 
 _atom_site_aniso_U_12 
In 0.0353(3) 0.0400(3) 0.0289(3) 0.0019(2) 0.0063(2) -0.0059(2) 
S1 0.0432(10) 0.0691(12) 0.0316(9) -0.0095(9) 0.0088(8) -0.0162(9) 
S2 0.0567(11) 0.0533(11) 0.0404(10) 0.0048(9) -0.0072(9) -0.0171(9) 
S3 0.0344(9) 0.0555(11) 0.0323(9) 0.0068(8) 0.0043(7) 0.0000(8) 
P1 0.0567(11) 0.0485(11) 0.0336(10) -0.0039(9) 0.0026(9) -0.0102(9) 
P2 0.0405(10) 0.0389(10) 0.0337(10) -0.0038(8) 0.0093(8) -0.0045(8) 
P3 0.0345(9) 0.0411(10) 0.0339(9) -0.0015(8) 0.0078(8) -0.0049(8) 
C11 0.046(4) 0.048(4) 0.026(4) -0.008(3) 0.005(3) -0.009(3) 
C12 0.058(5) 0.068(5) 0.034(4) -0.006(4) -0.004(4) -0.009(4) 
C13 0.078(6) 0.067(5) 0.033(4) 0.007(4) 0.010(4) -0.021(4) 
C14 0.062(5) 0.080(6) 0.038(4) 0.002(4) 0.021(4) -0.024(4) 
C15 0.042(4) 0.069(5) 0.046(5) -0.012(4) 0.015(4) -0.006(4) 
C16 0.050(4) 0.047(4) 0.031(4) -0.009(3) 0.018(3) -0.014(3) 
C21 0.094(7) 0.062(5) 0.058(5) 0.005(4) -0.021(5) -0.010(5) 
C22 0.111(8) 0.079(7) 0.085(7) 0.015(6) -0.052(7) -0.034(7) 
C23 0.072(7) 0.103(9) 0.097(8) 0.047(7) -0.047(6) -0.041(6) 
C24 0.065(6) 0.094(7) 0.104(8) 0.036(7) -0.015(6) -0.006(5) 
C25 0.065(6) 0.079(6) 0.072(6) 0.008(5) -0.005(5) -0.021(5) 
C26 0.071(5) 0.047(4) 0.045(4) 0.001(4) -0.003(4) -0.009(4) 
C31 0.095(6) 0.058(5) 0.060(5) -0.013(4) 0.019(5) -0.017(5) 
C32 0.136(9) 0.068(7) 0.089(8) -0.039(6) 0.032(7) -0.022(6) 
C33 0.118(9) 0.061(7) 0.141(11) -0.031(7) 0.058(8) -0.024(6) 
C34 0.087(7) 0.067(6) 0.104(8) 0.005(6) 0.039(6) 0.008(5) 
C35 0.056(5) 0.058(5) 0.071(6) -0.001(4) 0.019(4) -0.001(4) 
C36 0.039(4) 0.047(4) 0.047(4) -0.008(4) 0.010(3) -0.008(3) 
C41 0.047(4) 0.056(4) 0.035(4) -0.008(3) 0.012(3) -0.030(3) 
C42 0.053(5) 0.093(6) 0.044(5) -0.013(4) 0.016(4) -0.037(5) 
C43 0.047(5) 0.111(8) 0.066(6) -0.041(6) 0.032(5) -0.024(5) 
C44 0.047(5) 0.086(6) 0.086(7) -0.035(6) 0.021(5) -0.002(4) 
C45 0.045(4) 0.058(5) 0.055(5) -0.022(4) 0.019(4) -0.003(4) 
C46 0.035(4) 0.054(4) 0.036(4) -0.016(3) 0.012(3) -0.013(3) 
C51 0.056(5) 0.075(6) 0.074(6) -0.005(5) -0.003(5) 0.004(4) 
C52 0.080(6) 0.095(7) 0.078(7) -0.009(6) -0.024(6) 0.020(6) 
C53 0.112(9) 0.110(8) 0.056(6) -0.012(6) -0.022(6) 0.051(7) 
C54 0.106(8) 0.122(9) 0.068(7) 0.041(6) 0.019(6) 0.038(7) 
C55 0.060(5) 0.087(6) 0.074(6) 0.027(5) 0.009(5) 0.006(5) 
C56 0.056(5) 0.047(4) 0.037(4) -0.010(3) 0.003(3) 0.005(4) 
C61 0.052(4) 0.056(5) 0.040(4) -0.006(4) 0.018(4) -0.012(4) 
C62 0.064(5) 0.082(6) 0.061(5) -0.006(5) 0.008(4) -0.030(5) 
C63 0.045(5) 0.086(6) 0.090(7) 0.001(5) 0.024(5) -0.016(4) 
C64 0.067(6) 0.086(6) 0.061(6) -0.003(5) 0.029(5) -0.012(5) 
C65 0.054(5) 0.064(5) 0.039(4) -0.003(4) 0.015(3) -0.003(4) 
C66 0.039(4) 0.033(4) 0.041(4) 0.000(3) 0.012(3) -0.003(3) 
C71 0.035(4) 0.038(4) 0.032(4) 0.004(3) 0.008(3) -0.002(3) 
C72 0.041(4) 0.044(4) 0.049(4) 0.004(3) 0.021(3) 0.013(3) 
C73 0.063(5) 0.064(5) 0.036(4) 0.006(4) 0.023(4) 0.006(4) 
C74 0.073(5) 0.059(5) 0.030(4) 0.011(4) 0.016(4) -0.004(4) 
C75 0.050(4) 0.047(4) 0.035(4) 0.011(3) 0.009(3) 0.001(3) 
C76 0.031(3) 0.039(4) 0.035(4) 0.003(3) 0.010(3) -0.005(3) 
C81 0.050(5) 0.074(5) 0.062(5) -0.025(4) 0.017(4) -0.015(4) 
C82 0.088(7) 0.084(6) 0.072(6) -0.038(5) 0.002(5) -0.010(5) 
C83 0.079(7) 0.078(6) 0.095(8) -0.012(6) -0.020(6) -0.035(5) 
C84 0.071(6) 0.101(7) 0.081(7) -0.010(6) 0.009(5) -0.048(5) 
C85 0.059(5) 0.087(6) 0.052(5) -0.009(4) 0.013(4) -0.034(5) 
C86 0.041(4) 0.041(4) 0.044(4) 0.001(3) 0.008(3) -0.001(3) 
C91 0.047(4) 0.050(4) 0.048(4) 0.000(4) 0.006(4) -0.006(4) 
C92 0.044(4) 0.082(6) 0.057(5) 0.003(5) 0.011(4) 0.000(4) 
C93 0.055(5) 0.085(6) 0.047(5) 0.006(4) 0.013(4) 0.030(5) 
C94 0.068(5) 0.055(5) 0.062(5) -0.006(4) 0.004(4) 0.012(4) 
C95 0.048(4) 0.062(5) 0.059(5) 0.000(4) 0.006(4) 0.002(4) 
C96 0.035(4) 0.035(4) 0.033(4) 0.005(3) 0.012(3) 0.002(3) 
  
_geom_special_details 
; 
 All esds (except the esd in the dihedral angle between two l.s. planes) 
 are estimated using the full covariance matrix.  The cell esds are taken 
 into account individually in the estimation of esds in distances, angles 
 and torsion angles; correlations between esds in cell parameters are only 
 used when they are defined by crystal symmetry.  An approximate (isotropic) 
 treatment of cell esds is used for estimating esds involving l.s. planes. 
; 
  
loop_ 
 _geom_bond_atom_site_label_1 
 _geom_bond_atom_site_label_2 
 _geom_bond_distance 
 _geom_bond_site_symmetry_2 
 _geom_bond_publ_flag 
In S1 2.518(2) . ? 
In S2 2.550(2) . ? 
In S3 2.557(2) . ? 
In P3 2.728(2) . ? 
In P2 2.812(2) . ? 
In P1 2.963(2) . ? 
S1 C11 1.777(6) . ? 
S2 C41 1.781(7) . ? 
S3 C71 1.775(6) . ? 
P1 C16 1.804(7) . ? 
P1 C26 1.812(8) . ? 
P1 C36 1.821(7) . ? 
P2 C46 1.815(6) . ? 
P2 C56 1.820(7) . ? 
P2 C66 1.822(6) . ? 
P3 C86 1.817(6) . ? 
P3 C76 1.818(6) . ? 
P3 C96 1.825(6) . ? 
C11 C12 1.373(9) . ? 
C11 C16 1.428(9) . ? 
C12 C13 1.402(10) . ? 
C13 C14 1.374(10) . ? 
C14 C15 1.367(10) . ? 
C15 C16 1.403(9) . ? 
C21 C22 1.369(12) . ? 
C21 C26 1.386(10) . ? 
C22 C23 1.355(14) . ? 
C23 C24 1.374(13) . ? 
C24 C25 1.391(11) . ? 
C25 C26 1.392(11) . ? 
C31 C32 1.382(11) . ? 
C31 C36 1.386(10) . ? 
C32 C33 1.344(14) . ? 
C33 C34 1.374(13) . ? 
C34 C35 1.387(11) . ? 
C35 C36 1.393(10) . ? 
C41 C46 1.394(9) . ? 
C41 C42 1.412(10) . ? 
C42 C43 1.372(11) . ? 
C43 C44 1.399(12) . ? 
C44 C45 1.373(10) . ? 
C45 C46 1.392(9) . ? 
C51 C56 1.369(10) . ? 
C51 C52 1.370(11) . ? 
C52 C53 1.373(13) . ? 
C53 C54 1.366(13) . ? 
C54 C55 1.381(11) . ? 
C55 C56 1.383(10) . ? 
C61 C66 1.369(9) . ? 
C61 C62 1.381(9) . ? 
C62 C63 1.382(11) . ? 
C63 C64 1.362(11) . ? 
C64 C65 1.379(10) . ? 
C65 C66 1.419(9) . ? 
C71 C72 1.397(8) . ? 
C71 C76 1.400(8) . ? 
C72 C73 1.382(9) . ? 
C73 C74 1.366(9) . ? 
C74 C75 1.390(9) . ? 
C75 C76 1.407(8) . ? 
C81 C82 1.373(10) . ? 
C81 C86 1.384(9) . ? 
C82 C83 1.374(12) . ? 
C83 C84 1.372(12) . ? 
C84 C85 1.359(10) . ? 
C85 C86 1.378(9) . ? 
C91 C92 1.364(9) . ? 
C91 C96 1.381(8) . ? 
C92 C93 1.387(10) . ? 
C93 C94 1.378(10) . ? 
C94 C95 1.378(9) . ? 
C95 C96 1.387(9) . ? 
  
loop_ 
 _geom_angle_atom_site_label_1 
 _geom_angle_atom_site_label_2 
 _geom_angle_atom_site_label_3 
 _geom_angle 
 _geom_angle_site_symmetry_1 
 _geom_angle_site_symmetry_3 
 _geom_angle_publ_flag 
S1 In S2 161.91(6) . . ? 
S1 In S3 95.50(5) . . ? 
S2 In S3 96.85(6) . . ? 
S1 In P3 106.15(6) . . ? 
S2 In P3 90.02(5) . . ? 
S3 In P3 73.60(5) . . ? 
S1 In P2 92.52(6) . . ? 
S2 In P2 72.26(5) . . ? 
S3 In P2 100.53(5) . . ? 
P3 In P2 160.77(5) . . ? 
S1 In P1 71.31(5) . . ? 
S2 In P1 100.22(6) . . ? 
S3 In P1 158.60(5) . . ? 
P3 In P1 93.50(5) . . ? 
P2 In P1 96.90(5) . . ? 
C11 S1 In 101.1(2) . . ? 
C41 S2 In 96.6(2) . . ? 
C71 S3 In 97.8(2) . . ? 
C16 P1 C26 105.3(3) . . ? 
C16 P1 C36 105.1(3) . . ? 
C26 P1 C36 102.7(3) . . ? 
C16 P1 In 94.4(2) . . ? 
C26 P1 In 128.0(3) . . ? 
C36 P1 In 118.0(2) . . ? 
C46 P2 C56 106.4(3) . . ? 
C46 P2 C66 104.6(3) . . ? 
C56 P2 C66 107.8(3) . . ? 
C46 P2 In 94.5(2) . . ? 
C56 P2 In 121.8(2) . . ? 
C66 P2 In 118.4(2) . . ? 
C86 P3 C76 107.8(3) . . ? 
C86 P3 C96 104.7(3) . . ? 
C76 P3 C96 106.0(3) . . ? 
C86 P3 In 114.4(2) . . ? 
C76 P3 In 95.6(2) . . ? 
C96 P3 In 126.4(2) . . ? 
C12 C11 C16 118.7(6) . . ? 
C12 C11 S1 119.6(5) . . ? 
C16 C11 S1 121.7(5) . . ? 
C11 C12 C13 121.2(7) . . ? 
C14 C13 C12 119.9(7) . . ? 
C15 C14 C13 120.2(7) . . ? 
C14 C15 C16 121.2(7) . . ? 
C15 C16 C11 118.6(6) . . ? 
C15 C16 P1 123.4(5) . . ? 
C11 C16 P1 117.9(5) . . ? 
C22 C21 C26 119.8(9) . . ? 
C23 C22 C21 120.8(10) . . ? 
C22 C23 C24 120.9(9) . . ? 
C23 C24 C25 119.3(10) . . ? 
C24 C25 C26 119.7(9) . . ? 
C21 C26 C25 119.5(7) . . ? 
C21 C26 P1 117.4(7) . . ? 
C25 C26 P1 123.1(6) . . ? 
C32 C31 C36 120.5(9) . . ? 
C33 C32 C31 119.6(9) . . ? 
C32 C33 C34 122.3(9) . . ? 
C33 C34 C35 118.4(9) . . ? 
C34 C35 C36 120.6(8) . . ? 
C31 C36 C35 118.5(7) . . ? 
C31 C36 P1 122.4(6) . . ? 
C35 C36 P1 119.1(5) . . ? 
C46 C41 C42 118.1(7) . . ? 
C46 C41 S2 122.0(5) . . ? 
C42 C41 S2 119.9(6) . . ? 
C43 C42 C41 120.5(8) . . ? 
C42 C43 C44 121.1(7) . . ? 
C45 C44 C43 118.7(8) . . ? 
C44 C45 C46 121.1(8) . . ? 
C45 C46 C41 120.5(6) . . ? 
C45 C46 P2 122.4(5) . . ? 
C41 C46 P2 116.9(5) . . ? 
C56 C51 C52 121.8(9) . . ? 
C51 C52 C53 119.3(9) . . ? 
C54 C53 C52 120.1(9) . . ? 
C53 C54 C55 120.1(10) . . ? 
C54 C55 C56 120.4(8) . . ? 
C51 C56 C55 118.2(7) . . ? 
C51 C56 P2 117.4(6) . . ? 
C55 C56 P2 124.4(6) . . ? 
C66 C61 C62 121.7(7) . . ? 
C61 C62 C63 120.1(8) . . ? 
C64 C63 C62 119.3(7) . . ? 
C63 C64 C65 121.4(7) . . ? 
C64 C65 C66 119.8(7) . . ? 
C61 C66 C65 117.7(6) . . ? 
C61 C66 P2 122.5(5) . . ? 
C65 C66 P2 119.5(5) . . ? 
C72 C71 C76 118.1(6) . . ? 
C72 C71 S3 119.7(5) . . ? 
C76 C71 S3 122.1(5) . . ? 
C73 C72 C71 120.6(6) . . ? 
C74 C73 C72 121.3(6) . . ? 
C73 C74 C75 119.9(6) . . ? 
C74 C75 C76 119.4(6) . . ? 
C71 C76 C75 120.7(6) . . ? 
C71 C76 P3 116.9(5) . . ? 
C75 C76 P3 122.1(5) . . ? 
C82 C81 C86 121.8(7) . . ? 
C81 C82 C83 119.3(8) . . ? 
C84 C83 C82 119.2(8) . . ? 
C85 C84 C83 121.2(8) . . ? 
C84 C85 C86 120.8(8) . . ? 
C85 C86 C81 117.6(6) . . ? 
C85 C86 P3 123.6(5) . . ? 
C81 C86 P3 118.8(5) . . ? 
C92 C91 C96 121.2(7) . . ? 
C91 C92 C93 120.8(7) . . ? 
C94 C93 C92 118.7(7) . . ? 
C93 C94 C95 120.3(7) . . ? 
C94 C95 C96 121.1(7) . . ? 
C91 C96 C95 117.9(6) . . ? 
C91 C96 P3 119.5(5) . . ? 
C95 C96 P3 122.4(5) . . ? 
  
_refine_diff_density_max    1.401 
_refine_diff_density_min   -1.852 
_refine_diff_density_rms    0.102 


data_as014 
  
_audit_creation_method            SHELXL 
_chemical_name_systematic 
; 
 ? 
; 
_chemical_name_common             ? 
_chemical_formula_moiety          ? 
_chemical_formula_structural      ? 
_chemical_formula_analytical      ? 
_chemical_formula_sum             'C42 H41 In N2 P2 S4' 
_chemical_formula_weight          878.77 
_chemical_melting_point           ? 
_chemical_compound_source         ? 
  
loop_ 
 _atom_type_symbol 
 _atom_type_description 
 _atom_type_scat_dispersion_real 
 _atom_type_scat_dispersion_imag 
 _atom_type_scat_source 
 'C'  'C'   0.0033   0.0016 
 'International Tables Vol C Tables 4.2.6.8 and 6.1.1.4' 
 'H'  'H'   0.0000   0.0000 
 'International Tables Vol C Tables 4.2.6.8 and 6.1.1.4' 
 'P'  'P'   0.1023   0.0942 
 'International Tables Vol C Tables 4.2.6.8 and 6.1.1.4' 
 'S'  'S'   0.1246   0.1234 
 'International Tables Vol C Tables 4.2.6.8 and 6.1.1.4' 
 'In'  'In'  -0.7276   1.3100 
 'International Tables Vol C Tables 4.2.6.8 and 6.1.1.4' 
 'N'  'N'   0.0061   0.0033 
 'International Tables Vol C Tables 4.2.6.8 and 6.1.1.4' 
  
_symmetry_cell_setting            Monoclinic 
_symmetry_space_group_name_H-M    P2(1) 
  
loop_ 
 _symmetry_equiv_pos_as_xyz 
 'x, y, z' 
 '-x, y+1/2, -z' 
  
_cell_length_a                    13.0052(2) 
_cell_length_b                    11.2240(2) 
_cell_length_c                    14.3070(3) 
_cell_angle_alpha                 90.00 
_cell_angle_beta                  93.190(1) 
_cell_angle_gamma                 90.00 
_cell_volume                      2085.16(7) 
_cell_formula_units_Z             2 
_cell_measurement_temperature     298(2) 
_cell_measurement_reflns_used     'reflections from 60 data frames' 
_cell_measurement_theta_min       1.47 
_cell_measurement_theta_max       30.00 
  
_exptl_crystal_description        block 
_exptl_crystal_colour             ? 
_exptl_crystal_size_max           0.40 
_exptl_crystal_size_mid           0.40 
_exptl_crystal_size_min           0.40 
_exptl_crystal_density_meas       ? 
_exptl_crystal_density_diffrn     1.400 
_exptl_crystal_density_method     ? 
_exptl_crystal_F_000              900 
_exptl_absorpt_coefficient_mu     0.875 
_exptl_absorpt_correction_type    empirical 
_exptl_absorpt_correction_T_min   0.1848 
_exptl_absorpt_correction_T_max   0.3229 
  
_exptl_special_details 
; 
 ? 
; 
  
_diffrn_ambient_temperature       298(2) 
_diffrn_radiation_wavelength      0.71073 
_diffrn_radiation_type            MoK\a 
_diffrn_radiation_source          'fine-focus sealed tube' 
_diffrn_radiation_monochromator   graphite 
_diffrn_measurement_device        'Siemens SMART CCD' 
_diffrn_measurement_method        'hemisphere scans' 
_diffrn_standards_number          '50 standard frames at start and end' 
_diffrn_standards_interval_count  ? 
_diffrn_standards_interval_time   ? 
_diffrn_standards_decay_%         <1 
_diffrn_reflns_number             10546 
_diffrn_reflns_av_R_equivalents   0.0399 
_diffrn_reflns_av_sigmaI/netI     0.0326 
_diffrn_reflns_limit_h_min        -17 
_diffrn_reflns_limit_h_max        11 
_diffrn_reflns_limit_k_min        -14 
_diffrn_reflns_limit_k_max        14 
_diffrn_reflns_limit_l_min        -18 
_diffrn_reflns_limit_l_max        17 
_diffrn_reflns_theta_min          1.43 
_diffrn_reflns_theta_max          25.00 
_reflns_number_total              6651 
_reflns_number_observed           6404 
_reflns_observed_criterion        >2sigma(I) 
  
_computing_data_collection        'Siemens SMART' 
_computing_cell_refinement        'Siemens SAINT' 
_computing_data_reduction         'Siemens SHELXTL XPREP' 
_computing_structure_solution     'SHELXS-86 (Sheldrick, 1990)' 
_computing_structure_refinement   'SHELXL-93 (Sheldrick, 1993)' 
_computing_molecular_graphics     'Siemens SHELXTL XP' 
_computing_publication_material   'Siemens SHELXTL XCIF' 
  
_refine_special_details 
; 
 Refinement on F^2^ for ALL reflections except for 7 with very negative F^2^ 
 or flagged by the user for potential systematic errors.  Weighted R-factors 
 wR and all goodnesses of fit S are based on F^2^, conventional R-factors R 
 are based on F, with F set to zero for negative F^2^. The observed criterion 
 of F^2^ > 2sigma(F^2^) is used only for calculating _R_factor_obs etc. and is 
 not relevant to the choice of reflections for refinement.  R-factors based 
 on F^2^ are statistically about twice as large as those based on F, and R- 
 factors based on ALL data will be even larger. 
; 
  
_refine_ls_structure_factor_coef  Fsqd 
_refine_ls_matrix_type            full 
_refine_ls_weighting_scheme 
 'calc w=1/[\s^2^(Fo^2^)+(0.0504P)^2^+1.3578P] where P=(Fo^2^+2Fc^2^)/3' 
_atom_sites_solution_primary      direct 
_atom_sites_solution_secondary    difmap 
_atom_sites_solution_hydrogens    geom 
_refine_ls_hydrogen_treatment     idealized 
_refine_ls_extinction_method      none 
_refine_ls_extinction_coef        ? 
_refine_ls_abs_structure_details 
 'Flack H D (1983), Acta Cryst. A39, 876-881' 
_refine_ls_abs_structure_Flack    -0.01(2) 
_refine_ls_number_reflns          6644 
_refine_ls_number_parameters      461 
_refine_ls_number_restraints      1 
_refine_ls_R_factor_all           0.0381 
_refine_ls_R_factor_obs           0.0352 
_refine_ls_wR_factor_all          0.0929 
_refine_ls_wR_factor_obs          0.0869 
_refine_ls_goodness_of_fit_all    1.122 
_refine_ls_goodness_of_fit_obs    1.100 
_refine_ls_restrained_S_all       1.152 
_refine_ls_restrained_S_obs       1.100 
_refine_ls_shift/esd_max          -0.076 
_refine_ls_shift/esd_mean         0.002 
  
loop_ 
 _atom_site_label 
 _atom_site_type_symbol 
 _atom_site_fract_x 
 _atom_site_fract_y 
 _atom_site_fract_z 
 _atom_site_U_iso_or_equiv 
 _atom_site_thermal_displace_type 
 _atom_site_occupancy 
 _atom_site_calc_flag 
 _atom_site_refinement_flags 
 _atom_site_disorder_group 
In In -0.34291(2) 0.75336(2) 0.81682(2) 0.03189(9) Uani 1 d . . 
P1 P -0.51246(8) 0.76731(12) 0.69948(7) 0.0334(2) Uani 1 d . . 
P2 P -0.16684(8) 0.67006(10) 0.75344(7) 0.0313(2) Uani 1 d . . 
S1 S -0.41285(9) 0.53741(11) 0.82354(10) 0.0492(3) Uani 1 d . . 
S2 S -0.47662(9) 0.85741(12) 0.91287(8) 0.0445(3) Uani 1 d . . 
S3 S -0.27178(9) 0.93574(11) 0.72304(9) 0.0439(3) Uani 1 d . . 
S4 S -0.21407(7) 0.74696(15) 0.96189(6) 0.0393(2) Uani 1 d . . 
C1 C -0.4796(6) 0.8531(8) 0.5217(4) 0.088(3) Uani 1 d . . 
H1A H -0.4433(6) 0.9123(8) 0.5549(4) 0.106 Uiso 1 calc R . 
C2 C -0.4852(8) 0.8574(9) 0.4252(5) 0.106(3) Uani 1 d . . 
H2A H -0.4561(8) 0.9207(9) 0.3940(5) 0.127 Uiso 1 calc R . 
C3 C -0.5344(6) 0.7666(9) 0.3757(4) 0.086(2) Uani 1 d . . 
H3A H -0.5345(6) 0.7649(9) 0.3107(4) 0.103 Uiso 1 calc R . 
C4 C -0.5823(7) 0.6804(7) 0.4221(5) 0.088(2) Uani 1 d . . 
H4A H -0.6178(7) 0.6209(7) 0.3886(5) 0.106 Uiso 1 calc R . 
C5 C -0.5795(6) 0.6790(6) 0.5203(4) 0.071(2) Uani 1 d . . 
H5A H -0.6144(6) 0.6196(6) 0.5509(4) 0.085 Uiso 1 calc R . 
C6 C -0.5265(3) 0.7630(6) 0.5711(3) 0.0444(10) Uani 1 d . . 
C11 C -0.5456(4) 0.5517(4) 0.7940(3) 0.0377(10) Uani 1 d . . 
C12 C -0.6107(5) 0.4605(5) 0.8230(4) 0.0498(13) Uani 1 d . . 
H12A H -0.5824(5) 0.3974(5) 0.8577(4) 0.060 Uiso 1 calc R . 
C13 C -0.7158(4) 0.4619(5) 0.8013(5) 0.060(2) Uani 1 d . . 
H13A H -0.7565(4) 0.3994(5) 0.8207(5) 0.073 Uiso 1 calc R . 
C14 C -0.7612(4) 0.5561(6) 0.7505(5) 0.063(2) Uani 1 d . . 
H14A H -0.8317(4) 0.5574(6) 0.7359(5) 0.076 Uiso 1 calc R . 
C15 C -0.6987(4) 0.6475(5) 0.7225(4) 0.0502(13) Uani 1 d . . 
H15A H -0.7287(4) 0.7116(5) 0.6900(4) 0.060 Uiso 1 calc R . 
C16 C -0.5916(4) 0.6470(4) 0.7412(3) 0.0367(10) Uani 1 d . . 
C21 C -0.5569(4) 0.9381(5) 0.8308(4) 0.0416(11) Uani 1 d . . 
C22 C -0.6097(4) 1.0398(5) 0.8627(4) 0.0506(14) Uani 1 d . . 
H22A H -0.6009(4) 1.0628(5) 0.9251(4) 0.061 Uiso 1 calc R . 
C23 C -0.6737(4) 1.1046(5) 0.8023(5) 0.062(2) Uani 1 d . . 
H23A H -0.7078(4) 1.1708(5) 0.8246(5) 0.075 Uiso 1 calc R . 
C24 C -0.6884(4) 1.0740(6) 0.7103(5) 0.064(2) Uani 1 d . . 
H24A H -0.7299(4) 1.1204(6) 0.6698(5) 0.077 Uiso 1 calc R . 
C25 C -0.6402(4) 0.9719(5) 0.6774(4) 0.0519(13) Uani 1 d . . 
H25A H -0.6515(4) 0.9498(5) 0.6150(4) 0.062 Uiso 1 calc R . 
C26 C -0.5755(3) 0.9027(4) 0.7366(4) 0.0366(11) Uani 1 d . . 
C31 C -0.0711(5) 0.6116(6) 0.5857(4) 0.0572(14) Uani 1 d . . 
H31A H -0.0292(5) 0.6780(6) 0.5956(4) 0.069 Uiso 1 calc R . 
C32 C -0.0613(6) 0.5383(8) 0.5069(4) 0.080(2) Uani 1 d . . 
H32A H -0.0123(6) 0.5565(8) 0.4643(4) 0.096 Uiso 1 calc R . 
C33 C -0.1228(7) 0.4409(7) 0.4923(4) 0.079(2) Uani 1 d . . 
H33A H -0.1154(7) 0.3936(7) 0.4398(4) 0.095 Uiso 1 calc R . 
C34 C -0.1948(7) 0.4124(7) 0.5539(5) 0.081(2) Uani 1 d . . 
H34A H -0.2354(7) 0.3448(7) 0.5441(5) 0.097 Uiso 1 calc R . 
C35 C -0.2080(5) 0.4844(6) 0.6322(4) 0.062(2) Uani 1 d . . 
H35A H -0.2590(5) 0.4665(6) 0.6731(4) 0.074 Uiso 1 calc R . 
C36 C -0.1454(4) 0.5818(5) 0.6486(3) 0.0430(11) Uani 1 d . . 
C41 C -0.1362(3) 0.9159(4) 0.7336(3) 0.0326(9) Uani 1 d . . 
C42 C -0.0718(4) 1.0176(4) 0.7276(3) 0.0417(11) Uani 1 d . . 
H42A H -0.1016(4) 1.0918(4) 0.7160(3) 0.050 Uiso 1 calc R . 
C43 C 0.0342(4) 1.0084(5) 0.7389(3) 0.0443(11) Uani 1 d . . 
H43A H 0.0748(4) 1.0760(5) 0.7337(3) 0.053 Uiso 1 calc R . 
C44 C 0.0809(4) 0.8979(5) 0.7580(3) 0.0473(12) Uani 1 d . . 
H44A H 0.1520(4) 0.8921(5) 0.7678(3) 0.057 Uiso 1 calc R . 
C45 C 0.0195(3) 0.7976(5) 0.7621(3) 0.0412(10) Uani 1 d . . 
H45A H 0.0503(3) 0.7240(5) 0.7741(3) 0.049 Uiso 1 calc R . 
C46 C -0.0881(3) 0.8041(4) 0.7485(3) 0.0333(9) Uani 1 d . . 
C51 C -0.1336(3) 0.6230(4) 0.9416(3) 0.0347(9) Uani 1 d . . 
C52 C -0.0883(3) 0.5611(5) 1.0182(3) 0.0449(11) Uani 1 d . . 
H52A H -0.1042(3) 0.5826(5) 1.0785(3) 0.054 Uiso 1 calc R . 
C53 C -0.0198(4) 0.4677(5) 1.0057(4) 0.0499(12) Uani 1 d . . 
H53A H 0.0108(4) 0.4292(5) 1.0576(4) 0.060 Uiso 1 calc R . 
C54 C 0.0033(4) 0.4318(5) 0.9167(4) 0.0469(12) Uani 1 d . . 
H54A H 0.0484(4) 0.3688(5) 0.9088(4) 0.056 Uiso 1 calc R . 
C55 C -0.0414(3) 0.4904(4) 0.8394(3) 0.0399(10) Uani 1 d . . 
H55A H -0.0266(3) 0.4659(4) 0.7795(3) 0.048 Uiso 1 calc R . 
C56 C -0.1085(3) 0.5861(4) 0.8508(3) 0.0331(9) Uani 1 d . . 
N80 N -0.7254(3) 0.7073(4) 1.0606(3) 0.0508(11) Uani 1 d . . 
C81 C -0.7882(12) 0.6045(11) 1.0354(8) 0.169(7) Uani 1 d . . 
H81A H -0.8581(12) 0.6293(11) 1.0218(8) 0.253 Uiso 1 calc R . 
H81B H -0.7858(12) 0.5489(11) 1.0864(8) 0.253 Uiso 1 calc R . 
H81C H -0.7624(12) 0.5670(11) 0.9811(8) 0.253 Uiso 1 calc R . 
C82 C -0.6169(6) 0.6760(10) 1.0824(9) 0.123(4) Uani 1 d . . 
H82A H -0.5785(6) 0.7468(10) 1.0987(9) 0.184 Uiso 1 calc R . 
H82B H -0.5890(6) 0.6394(10) 1.0287(9) 0.184 Uiso 1 calc R . 
H82C H -0.6123(6) 0.6214(10) 1.1341(9) 0.184 Uiso 1 calc R . 
C83 C -0.7328(6) 0.8048(8) 0.9912(7) 0.099(3) Uani 1 d . . 
H83A H -0.6894(6) 0.8696(8) 1.0124(7) 0.148 Uiso 1 calc R . 
H83B H -0.8029(6) 0.8318(8) 0.9839(7) 0.148 Uiso 1 calc R . 
H83C H -0.7111(6) 0.7763(8) 0.9321(7) 0.148 Uiso 1 calc R . 
C84 C -0.7607(8) 0.7522(11) 1.1502(6) 0.117(3) Uani 1 d . . 
H84A H -0.7207(8) 0.8207(11) 1.1694(6) 0.175 Uiso 1 calc R . 
H84B H -0.7523(8) 0.6911(11) 1.1970(6) 0.175 Uiso 1 calc R . 
H84C H -0.8320(8) 0.7739(11) 1.1425(6) 0.175 Uiso 1 calc R . 
N91 N 0.0795(7) 1.3009(7) 0.6654(7) 0.109(2) Uani 1 d . . 
C91 C 0.1275(7) 1.3279(8) 0.6065(6) 0.087(2) Uani 1 d . . 
C90 C 0.1925(10) 1.3638(13) 0.5340(8) 0.148(5) Uani 1 d . . 
H90A H 0.1692(46) 1.3270(68) 0.4760(17) 0.177 Uiso 1 calc R . 
H90B H 0.2621(17) 1.3396(72) 0.5501(33) 0.177 Uiso 1 calc R . 
H90C H 0.1899(54) 1.4489(16) 0.5273(44) 0.177 Uiso 1 calc R . 
  
loop_ 
 _atom_site_aniso_label 
 _atom_site_aniso_U_11 
 _atom_site_aniso_U_22 
 _atom_site_aniso_U_33 
 _atom_site_aniso_U_23 
 _atom_site_aniso_U_13 
 _atom_site_aniso_U_12 
In 0.02826(13) 0.03097(15) 0.03655(14) -0.00007(14) 0.00268(9) 0.00006(15) 
P1 0.0330(4) 0.0283(6) 0.0385(5) 0.0002(5) -0.0003(4) -0.0021(5) 
P2 0.0333(5) 0.0300(6) 0.0309(5) 0.0025(4) 0.0051(4) 0.0003(5) 
S1 0.0383(6) 0.0301(6) 0.0782(9) 0.0098(6) -0.0039(6) -0.0003(5) 
S2 0.0430(6) 0.0511(7) 0.0403(6) -0.0046(5) 0.0101(5) 0.0065(6) 
S3 0.0377(6) 0.0351(6) 0.0588(7) 0.0134(5) 0.0024(5) 0.0016(5) 
S4 0.0405(5) 0.0420(6) 0.0350(4) -0.0066(6) -0.0007(4) 0.0030(7) 
C1 0.112(6) 0.107(6) 0.045(3) -0.002(3) 0.001(3) -0.061(5) 
C2 0.146(8) 0.124(8) 0.047(4) 0.006(4) 0.002(4) -0.065(7) 
C3 0.121(5) 0.094(6) 0.042(3) -0.001(4) -0.010(3) 0.001(6) 
C4 0.148(7) 0.051(4) 0.061(4) -0.015(3) -0.033(4) -0.008(5) 
C5 0.117(5) 0.039(3) 0.056(3) -0.007(2) -0.009(3) -0.013(4) 
C6 0.049(2) 0.044(3) 0.039(2) 0.001(3) -0.001(2) 0.004(3) 
C11 0.041(2) 0.032(3) 0.041(3) -0.004(2) 0.008(2) -0.005(2) 
C12 0.056(3) 0.031(3) 0.063(3) 0.005(2) 0.009(3) -0.006(2) 
C13 0.049(3) 0.034(3) 0.100(5) -0.006(3) 0.022(3) -0.014(3) 
C14 0.032(2) 0.051(4) 0.107(5) -0.009(3) 0.007(3) -0.007(2) 
C15 0.037(2) 0.033(3) 0.081(4) 0.000(2) 0.001(2) 0.000(2) 
C16 0.034(2) 0.030(3) 0.046(3) -0.004(2) -0.001(2) -0.002(2) 
C21 0.033(2) 0.033(3) 0.061(3) -0.005(2) 0.014(2) -0.004(2) 
C22 0.039(3) 0.039(3) 0.075(4) -0.012(3) 0.014(2) -0.003(2) 
C23 0.047(3) 0.031(3) 0.111(5) 0.001(3) 0.018(3) 0.006(2) 
C24 0.045(3) 0.040(3) 0.107(5) 0.023(3) 0.001(3) 0.010(2) 
C25 0.047(3) 0.039(3) 0.071(3) 0.010(2) 0.002(2) -0.002(2) 
C26 0.028(2) 0.025(2) 0.058(3) 0.001(2) 0.007(2) 0.000(2) 
C31 0.078(4) 0.053(3) 0.042(3) -0.002(2) 0.019(3) -0.005(3) 
C32 0.112(6) 0.090(6) 0.041(3) -0.004(3) 0.026(3) 0.018(5) 
C33 0.116(6) 0.079(5) 0.042(3) -0.025(3) -0.001(3) 0.013(5) 
C34 0.117(6) 0.062(4) 0.063(4) -0.022(3) -0.005(4) -0.013(4) 
C35 0.070(4) 0.064(4) 0.052(3) -0.016(3) 0.006(3) -0.014(3) 
C36 0.053(3) 0.043(3) 0.032(2) 0.001(2) 0.002(2) 0.004(2) 
C41 0.039(2) 0.031(2) 0.029(2) 0.003(2) 0.009(2) -0.004(2) 
C42 0.052(3) 0.032(3) 0.043(2) 0.003(2) 0.014(2) -0.005(2) 
C43 0.045(3) 0.049(3) 0.039(2) 0.000(2) 0.011(2) -0.018(2) 
C44 0.039(2) 0.053(3) 0.051(3) 0.000(2) 0.012(2) -0.014(2) 
C45 0.033(2) 0.044(3) 0.047(2) 0.006(2) 0.010(2) 0.000(2) 
C46 0.033(2) 0.036(2) 0.031(2) 0.002(2) 0.006(2) 0.001(2) 
C51 0.028(2) 0.041(3) 0.035(2) 0.001(2) 0.002(2) -0.004(2) 
C52 0.037(2) 0.056(3) 0.041(2) 0.009(2) 0.000(2) -0.001(2) 
C53 0.041(3) 0.054(3) 0.054(3) 0.017(2) -0.003(2) 0.001(2) 
C54 0.034(2) 0.040(3) 0.066(3) 0.010(2) 0.000(2) 0.008(2) 
C55 0.035(2) 0.035(3) 0.051(3) 0.005(2) 0.010(2) 0.002(2) 
C56 0.032(2) 0.032(2) 0.035(2) 0.005(2) 0.002(2) -0.004(2) 
N80 0.047(2) 0.038(2) 0.068(3) 0.007(2) 0.012(2) -0.004(2) 
C81 0.253(16) 0.114(10) 0.132(9) 0.010(7) -0.048(9) -0.117(11) 
C82 0.063(4) 0.120(8) 0.187(10) 0.082(8) 0.013(5) 0.019(5) 
C83 0.064(4) 0.096(6) 0.136(7) 0.061(5) 0.001(4) 0.006(4) 
C84 0.146(8) 0.088(6) 0.122(6) 0.010(7) 0.051(5) 0.044(8) 
N91 0.136(7) 0.065(4) 0.129(6) -0.001(4) 0.032(5) 0.003(4) 
C91 0.102(6) 0.064(5) 0.094(6) -0.018(4) 0.000(5) 0.001(4) 
C90 0.151(10) 0.180(14) 0.116(8) -0.007(8) 0.040(7) -0.044(10) 
  
_geom_special_details 
; 
 All esds (except the esd in the dihedral angle between two l.s. planes) 
 are estimated using the full covariance matrix.  The cell esds are taken 
 into account individually in the estimation of esds in distances, angles 
 and torsion angles; correlations between esds in cell parameters are only 
 used when they are defined by crystal symmetry.  An approximate (isotropic) 
 treatment of cell esds is used for estimating esds involving l.s. planes. 
; 
  
loop_ 
 _geom_bond_atom_site_label_1 
 _geom_bond_atom_site_label_2 
 _geom_bond_distance 
 _geom_bond_site_symmetry_2 
 _geom_bond_publ_flag 
In S2 2.5578(11) . ? 
In S1 2.5925(13) . ? 
In S4 2.5949(9) . ? 
In S3 2.6428(12) . ? 
In P2 2.6779(11) . ? 
In P1 2.7006(10) . ? 
P1 C16 1.818(5) . ? 
P1 C26 1.820(5) . ? 
P1 C6 1.837(4) . ? 
P2 C56 1.813(4) . ? 
P2 C46 1.823(5) . ? 
P2 C36 1.832(5) . ? 
S1 C11 1.761(5) . ? 
S2 C21 1.776(6) . ? 
S3 C41 1.776(4) . ? 
S4 C51 1.774(5) . ? 
C1 C2 1.378(9) . ? 
C1 C6 1.394(9) . ? 
C2 C3 1.379(12) . ? 
C3 C4 1.346(12) . ? 
C4 C5 1.403(9) . ? 
C5 C6 1.355(8) . ? 
C11 C12 1.405(7) . ? 
C11 C16 1.422(7) . ? 
C12 C13 1.385(8) . ? 
C13 C14 1.396(9) . ? 
C14 C15 1.381(8) . ? 
C15 C16 1.405(7) . ? 
C21 C26 1.413(7) . ? 
C21 C22 1.420(7) . ? 
C22 C23 1.374(9) . ? 
C23 C24 1.363(10) . ? 
C24 C25 1.400(9) . ? 
C25 C26 1.396(7) . ? 
C31 C36 1.397(8) . ? 
C31 C32 1.407(9) . ? 
C32 C33 1.363(12) . ? 
C33 C34 1.360(11) . ? 
C34 C35 1.400(9) . ? 
C35 C36 1.376(8) . ? 
C41 C46 1.413(6) . ? 
C41 C42 1.421(7) . ? 
C42 C43 1.383(7) . ? 
C43 C44 1.401(8) . ? 
C44 C45 1.384(7) . ? 
C45 C46 1.405(6) . ? 
C51 C52 1.400(7) . ? 
C51 C56 1.419(6) . ? 
C52 C53 1.393(8) . ? 
C53 C54 1.384(8) . ? 
C54 C55 1.386(7) . ? 
C55 C56 1.400(7) . ? 
N80 C81 1.448(10) . ? 
N80 C82 1.470(8) . ? 
N80 C84 1.474(9) . ? 
N80 C83 1.478(8) . ? 
N91 C91 1.119(11) . ? 
C91 C90 1.432(14) . ? 
  
loop_ 
 _geom_angle_atom_site_label_1 
 _geom_angle_atom_site_label_2 
 _geom_angle_atom_site_label_3 
 _geom_angle 
 _geom_angle_site_symmetry_1 
 _geom_angle_site_symmetry_3 
 _geom_angle_publ_flag 
S2 In S1 99.01(4) . . ? 
S2 In S4 90.63(4) . . ? 
S1 In S4 99.02(5) . . ? 
S2 In S3 100.76(4) . . ? 
S1 In S3 151.22(5) . . ? 
S4 In S3 101.47(4) . . ? 
S2 In P2 163.96(4) . . ? 
S1 In P2 89.69(4) . . ? 
S4 In P2 74.63(3) . . ? 
S3 In P2 76.61(4) . . ? 
S2 In P1 75.61(4) . . ? 
S1 In P1 78.53(4) . . ? 
S4 In P1 165.33(3) . . ? 
S3 In P1 86.35(4) . . ? 
P2 In P1 119.59(3) . . ? 
C16 P1 C26 104.6(2) . . ? 
C16 P1 C6 106.4(2) . . ? 
C26 P1 C6 107.0(2) . . ? 
C16 P1 In 102.1(2) . . ? 
C26 P1 In 103.5(2) . . ? 
C6 P1 In 130.73(14) . . ? 
C56 P2 C46 104.3(2) . . ? 
C56 P2 C36 105.8(2) . . ? 
C46 P2 C36 107.7(2) . . ? 
C56 P2 In 104.50(14) . . ? 
C46 P2 In 102.56(14) . . ? 
C36 P2 In 129.6(2) . . ? 
C11 S1 In 104.3(2) . . ? 
C21 S2 In 105.7(2) . . ? 
C41 S3 In 103.50(15) . . ? 
C51 S4 In 104.55(14) . . ? 
C2 C1 C6 122.2(6) . . ? 
C3 C2 C1 119.1(7) . . ? 
C4 C3 C2 119.5(6) . . ? 
C3 C4 C5 121.0(6) . . ? 
C6 C5 C4 120.8(6) . . ? 
C5 C6 C1 117.2(5) . . ? 
C5 C6 P1 125.0(5) . . ? 
C1 C6 P1 117.8(4) . . ? 
C12 C11 C16 117.5(5) . . ? 
C12 C11 S1 117.5(4) . . ? 
C16 C11 S1 125.0(4) . . ? 
C13 C12 C11 122.0(5) . . ? 
C12 C13 C14 120.6(5) . . ? 
C15 C14 C13 118.4(5) . . ? 
C14 C15 C16 122.3(5) . . ? 
C15 C16 C11 119.2(4) . . ? 
C15 C16 P1 120.5(4) . . ? 
C11 C16 P1 120.3(4) . . ? 
C26 C21 C22 118.2(5) . . ? 
C26 C21 S2 123.4(4) . . ? 
C22 C21 S2 118.3(4) . . ? 
C23 C22 C21 120.7(6) . . ? 
C24 C23 C22 121.4(5) . . ? 
C23 C24 C25 119.4(5) . . ? 
C26 C25 C24 121.1(6) . . ? 
C25 C26 C21 119.2(5) . . ? 
C25 C26 P1 123.6(4) . . ? 
C21 C26 P1 117.2(4) . . ? 
C36 C31 C32 118.2(6) . . ? 
C33 C32 C31 120.9(7) . . ? 
C34 C33 C32 120.6(6) . . ? 
C33 C34 C35 120.2(7) . . ? 
C36 C35 C34 119.8(6) . . ? 
C35 C36 C31 120.3(5) . . ? 
C35 C36 P2 117.0(4) . . ? 
C31 C36 P2 122.7(4) . . ? 
C46 C41 C42 117.8(4) . . ? 
C46 C41 S3 123.6(3) . . ? 
C42 C41 S3 118.6(4) . . ? 
C43 C42 C41 121.3(5) . . ? 
C42 C43 C44 120.5(5) . . ? 
C45 C44 C43 118.9(4) . . ? 
C44 C45 C46 121.7(5) . . ? 
C45 C46 C41 119.7(4) . . ? 
C45 C46 P2 120.6(4) . . ? 
C41 C46 P2 119.6(3) . . ? 
C52 C51 C56 117.6(4) . . ? 
C52 C51 S4 119.2(4) . . ? 
C56 C51 S4 123.1(3) . . ? 
C53 C52 C51 121.2(5) . . ? 
C54 C53 C52 120.7(5) . . ? 
C53 C54 C55 119.6(5) . . ? 
C54 C55 C56 120.5(5) . . ? 
C55 C56 C51 120.5(4) . . ? 
C55 C56 P2 123.1(3) . . ? 
C51 C56 P2 116.4(3) . . ? 
C81 N80 C82 112.6(9) . . ? 
C81 N80 C84 106.9(8) . . ? 
C82 N80 C84 103.8(7) . . ? 
C81 N80 C83 114.0(7) . . ? 
C82 N80 C83 110.2(5) . . ? 
C84 N80 C83 108.6(7) . . ? 
N91 C91 C90 177.5(11) . . ? 
  
_refine_diff_density_max    0.955 
_refine_diff_density_min   -0.804 
_refine_diff_density_rms    0.076 
